1           **Domain-specific working memory, but not dopamine-related**  
2                   **genetic variability, shapes reward-based motor learning**

3

4                   Running title: Mechanisms of reward-based motor learning

5

6           **Peter Holland\*<sup>1</sup>, Olivier Codol\*<sup>1</sup>, Elizabeth Oxley<sup>1</sup>, Madison Taylor<sup>1</sup>, Elizabeth**  
7                   **Hamshere<sup>1</sup>, Shadiq Joseph<sup>1</sup>, Laura Huffer<sup>1</sup>, Joseph M. Galea<sup>1</sup>**

8

9           <sup>1</sup>*School of Psychology and Centre for Human Brain Health, University of Birmingham,*  
10                                   *Edgbaston, Birmingham, B15 2TT, UK*

11

12   \* = These authors provided equal contribution to this work

13

14   Number of Figures: 7

15   Number of Tables: 4

16   Number of Pages: 47

17   Words: Abstract = 250           Introduction = 650           Discussion = 1493

18   Keywords: Explicit control, Motor adaptation, Reinforcement, Retention

19   Acknowledgements: This work was supported by the European Research Council starting  
20   grant: MotMotLearn (637488)

21

22   Correspondence should be addressed to:

23   Peter Holland

24   Email: P.J.Holland@bham.ac.uk

## 25 **Abstract**

26 The addition of rewarding feedback to motor learning tasks has been shown to increase the  
27 retention of learning, spurring interest in the possible utility for rehabilitation. However,  
28 laboratory-based motor tasks employing rewarding feedback have repeatedly been shown to  
29 lead to great inter-individual variability in performance. Understanding the causes of such  
30 variability is vital for maximising the potential benefits of reward-based motor learning. Thus,  
31 using a large cohort (n=241) we examined whether spatial (SWM), verbal (VWM) and  
32 mental rotation (RWM) working memory capacity and dopamine-related genetic profiles  
33 were associated with performance in two reward-based motor tasks. The first task assessed  
34 participant's ability to follow a hidden and slowly shifting reward region based on hit/miss  
35 (binary) feedback. The second task investigated participant's capacity to preserve  
36 performance with binary feedback after adapting to the rotation with full visual feedback. Our  
37 results demonstrate that higher SWM is associated with greater success and a greater capacity  
38 to reproduce a successful motor action, measured as change in reach angle following reward.  
39 Whereas higher RWM was predictive of an increased propensity to express an explicit  
40 strategy when required to make large adjustments in reach angle. Therefore, both SWM and  
41 RWM were reliable predictors of success during reward-based motor learning. Change in  
42 reach direction following failure was also a strong predictor of success rate, although we  
43 observed no consistent relationship with any type of working memory. Surprisingly, no  
44 dopamine-related genotypes predicted performance. Therefore, working memory capacity  
45 plays a pivotal role in determining individual ability in reward-based motor learning.

46

## 47 **Significance statement**

48 Reward-based motor learning tasks have repeatedly been shown to lead to idiosyncratic  
49 behaviours that cause varying degrees of task success. Yet, the factors determining an

50 individual's capacity to use reward-based feedback are unclear. Here, we assessed a wide  
51 range of possible candidate predictors, and demonstrate that domain-specific working  
52 memory plays an essential role in determining individual capacity to use reward-based  
53 feedback. Surprisingly, genetic variations in dopamine availability were not found to play a  
54 role. This is in stark contrast with seminal work in the reinforcement and decision-making  
55 literature, which show strong and replicated effects of the same dopaminergic genes in  
56 decision-making. Therefore, our results provide novel insights into reward-based motor  
57 learning, highlighting a key role for domain-specific working memory capacity.

58

## 59 **Introduction**

60 When performing motor tasks under altered environmental conditions, adaptation to the new  
61 constraints occurs through the recruitment of a variety of systems (Taylor and Ivry, 2014).  
62 Arguably the most studied of those systems is cerebellum-dependent adaptation, which  
63 consists of the implicit and automatic recalibration of mappings between actual and expected  
64 outcomes, through sensory prediction errors (Morehead et al., 2017; Tseng et al., 2007).  
65 Besides cerebellar adaptation, other work has demonstrated the involvement of a more  
66 cognitive, deliberative process whereby motor plans are adjusted based on an individual's  
67 structural understanding of the task (Bond and Taylor, 2015; Taylor and Ivry, 2011). We  
68 label this process 'explicit control' (Codol et al., 2018; Holland et al., 2018) but it has also  
69 been referred to as strategy (Taylor and Ivry, 2011) or explicit re-aiming (Morehead et al.,  
70 2015). Recently it has been proposed that reinforcement learning, whereby the memory of  
71 successful or unsuccessful actions are strengthened or weakened, respectively, may also play  
72 a role (Huang et al., 2011; Izawa and Shadmehr, 2011; Shmuelof et al., 2012). Such reward-  
73 based reinforcement has been assumed to be an implicit and automatic process (Haith and  
74 Krakauer, 2013). However, recent evidence suggests that phenomena attributed to

75 reinforcement-based learning during visuomotor rotation tasks can largely be explained  
76 through explicit processes (Codol et al., 2018; Holland et al., 2018).

77

78 One outstanding feature of reinforcement-based motor learning is the great variability  
79 expressed across individuals (Codol et al., 2018; Holland et al., 2018; Therrien et al., 2016,  
80 2018). What factors underlie such variability is unclear. If reinforcement is indeed explicitly  
81 grounded, it could be argued that individual working memory capacity (WMC), which  
82 reliably predicts propensity to employ explicit control in classical motor adaptation tasks  
83 (Anguera et al., 2010; Christou et al., 2016; Sidarta et al., 2018), would also predict  
84 performance in a reinforcement-based motor learning task. If so, this would strengthen the  
85 proposal that reward based motor learning bears a strong explicit component. Anguera et al.,  
86 (2010) demonstrated that mental rotation WM (RWM), unlike other forms of working  
87 memory such as verbal working memory (VWM), correlates with explicit control. More  
88 recently, Christou et al. (2016) reported a similar correlation with spatial WM (SWM).

89

90 Another potential contributor to this variability is genetic profile. In previous work (Codol et  
91 al., 2018; Holland et al., 2018), we argue that reinforcement-based motor learning  
92 performance relies on a balance between exploration and exploitation of the task space, a  
93 feature reminiscent of structural learning and reinforcement-based decision-making (Daw et  
94 al., 2005; Frank et al., 2009; Sutton and Barto, 1998). A series of studies from Frank and  
95 colleagues suggests that individual tendencies to express explorative/exploitative behaviour  
96 can be predicted based on dopamine-related genetic profile (Doll et al., 2016; Frank et al.,  
97 2007, 2009). Reinforcement has consistently been linked to dopaminergic function in a  
98 variety of paradigms, and thus, such a relationship could also be expected in reward-based  
99 motor learning (Pekny et al., 2015). Specifically, Frank and colleagues focused on

100 Catecholamine-O-Methyl-Transferase (COMT), Dopamine- and cAMP-Regulated neuronal  
101 Phosphoprotein (DARPP32) and Dopamine Receptor D2 (DRD2), and suggest a distinction  
102 between COMT-modulated exploration and DARPP32- and DRD2-modulated exploitation  
103 (Frank et al., 2009).

104

105 Consequently, we investigated the influence of WM capacity (RWM, SWM, and VWM) and  
106 genetic variations in dopamine metabolism (DRD2, DARPP32, and COMT) on an individual's  
107 ability to perform reward-based motor learning. We examined this using two established  
108 reward-based motor learning tasks. First, a task analogous to a gradually introduced rotation  
109 (Holland et al., 2018) required participants to learn to adjust the angle at which they reached  
110 to a slowly and secretly shifting reward region (Acquire); second, a task with an abruptly  
111 introduced rotation (Codol et al., 2018; Shmuelof et al., 2012) required participants to  
112 preserve performance with reward-based feedback after adapting to a visuomotor rotation  
113 (Preserve). The use of these two tasks enabled us to examine whether similar predictors of  
114 performance explained participant's capacity to acquire and preserve behaviour with reward-  
115 based feedback.

116

## 117 **Methods**

118 Prior to the start of data collection, the sample size, variables of interest and analysis method  
119 were pre-registered. The pre-registered information, data and analysis code can be found  
120 online at <https://osf.io/j5v2s/> and <https://osf.io/rmwc2/> for the Preserve and Acquire tasks,  
121 respectively.

## 122 **Participants**

123 121 (30 male, mean age: 21.06, range: 18-32) and 120 (16 male, mean age: 19.24, range: 18-  
124 32) participants were recruited for the Acquire and Preserve tasks, respectively. All

125 participants provided informed consent and were remunerated with either course credit or  
126 money (£7.50/hour). All participants were free of psychological, cognitive, motor or  
127 uncorrected visual impairment. The study was approved by and performed in accordance  
128 with the local research ethics committee of the University of Birmingham, UK.

### 129 **Experimental design**

130 Participants were seated before a horizontally fixed mirror reflecting a screen placed above,  
131 on which visual stimuli were presented. This arrangement resulted in the stimuli appearing at  
132 the level on which participants performed their reaching movements. The Acquire (gradual)  
133 and Preserve (abrupt) tasks were performed on two different stations, with a KINARM  
134 (BKIN Technology, London, Ontario; sampling rate: 1000Hz) and a Polhemus 3SPACE  
135 Fastrak tracking device (Colchester, Vermont U.S.A.; sampling rate: 120Hz), employed  
136 respectively. The Acquire task was run using Simulink (The Mathworks, Natwick, MA) and  
137 Dexterit-E (BKIN Technology), while the Preserve task was run using Matlab (The  
138 Mathworks, Natwick, MA) and Psychophysics toolbox (Brainard, 1997). The Acquire task  
139 employed the same paradigm and equipment as Holland et al. (2018), with the exception of  
140 the maximum reaction time (RT) which was increased from 0.6s to 1s, and the maximum  
141 movement time (MT) which was reduced from 1s to 0.6s. The Preserve task used the same  
142 setup and display as in Codol et al. (2018); however, the number of ‘refresher’ trials during  
143 the binary feedback (BF) blocks was increased from one to two in every 10 trials. The  
144 designs were kept as close as possible to their respective original publications to promote  
145 replication and comparability across studies. In both tasks reaching movements were made  
146 with the dominant arm.

### 147 **Reaching tasks**

148 *Acquire task.* Participants performed 670 trials, each of which followed a stereotyped  
149 timeline. The starting position for each trial was in a consistent position roughly 30cm in

150 front of the midline and was indicated by a red circle (1cm radius). After holding the position  
151 of the handle within the starting position, a target (red circle, 1cm radius) appeared directly in  
152 front of the starting position at a distance of 10cm. Participants were instructed to make a  
153 rapid ‘shooting’ movement that passed through the target. If the cursor position at a radial  
154 distance of 10cm was within a reward region ( $\pm 5.67^\circ$ , initially centred on the visible target;  
155 grey region in Figure 1a) the target changed colour from red to green and a green tick was  
156 displayed just above the target position, informing participants of the success of their  
157 movement. If, however, the cursor did not pass through the reward region, the target  
158 disappeared from view and no tick was displayed, signalling failure (binary feedback). After  
159 each movement, the robot returned to the starting position and participants were instructed to  
160 passively allow this.

161 For the first 10 trials, the position of the robotic handle was displayed as a white cursor (0.5  
162 cm radius) on screen, following this practice block the cursor was extinguished for the  
163 remainder of the experiment and participants only received binary feedback. The baseline  
164 block consisted of the first 40 trials under binary feedback, during this period the reward  
165 region remained centred on the visible target. Subsequently, unbeknownst to the participant  
166 the reward region rotated in steps of  $1^\circ$  every 20 trials; the direction of rotation was  
167 counterbalanced across participants. After reaching a rotation of  $25^\circ$  the reward region was  
168 held constant for an additional 20 trials. Performance during these last 20 trials was used to  
169 determine overall task success. Subsequently, binary feedback was removed, and participants  
170 were instructed to continue reaching as they were (maintain block) for the following 50 trials.  
171 Following this, participants were then informed that the reward region shifted during the  
172 experiment but not of the magnitude or the direction of the shift. They were then instructed to  
173 return to reaching in the same manner as they were at the start of the experiment (remove

174 block, 50 trials). During the learning phase of the task participants were given a 1-minute rest  
175 after trials 190 and 340.

176 *Preserve task.* Participants performed 515 trials in total. On each trial participants were  
177 instructed to make a rapid ‘shooting’ movement that passed through a target (white circle,  
178 radius: 0.125cm) visible on the screen. The starting position for each trial was indicated by a  
179 white square (width: 1cm) roughly 30cm in front of the midline and the target was located at  
180 angle of 45° from the perpendicular in a counter clockwise direction at a distance of 8cm. The  
181 position of the tracking device attached to the fingertip was displayed as a cursor (green  
182 circle, radius: 0.125cm). When the radial distance of the cursor from the starting position  
183 exceeded 8cm, the cursor feedback disappeared, and the end position was displayed instead.

184 First, participants performed a baseline period of 40 trials, during which the position of the  
185 cursor was visible and the cursor accurately reflected the position of the fingertip. In the  
186 adaptation block (75 trials), participants were exposed to an abruptly introduced 20°  
187 clockwise visuomotor rotation of the cursor feedback (Figure 1b). Subsequently, all visual  
188 feedback of the cursor was removed, and participants received only binary feedback. If the  
189 end position of the movement fell within a reward region, the trial was considered successful  
190 and a tick was displayed; otherwise a cross was displayed. The reward region was centred at  
191 a clockwise rotation of 20° with respect to the visual target with a width of 10° i.e. it was  
192 centred on the direction that successfully accounted for the previously experienced  
193 visuomotor rotation. Binary feedback was provided for 200 trials divided into 2 blocks of 100  
194 trials (asymptote blocks). Furthermore, participants experienced 2 “refresher” trials for every  
195 10 trials, where rotated visual feedback of the cursor position was again accessible (Codol et  
196 al., 2018; Shmuelof et al., 2012). This represents an increase compared to Codol et al. (2018)  
197 because participants in this study tended to have poorer performance under binary feedback,  
198 possibly due to a fatigue effect following the WM tasks (Anguera et al., 2012; see discussion).



199 Finally, two blocks (100 trials each) with no performance feedback were employed in order  
200 to assess retention of the perturbation (no-feedback blocks). Before the first of those two  
201 blocks, participants were informed of the visuomotor rotation, asked to stop accounting for it  
202 through aiming off target and to aim straight at the target.

203

204

205

206

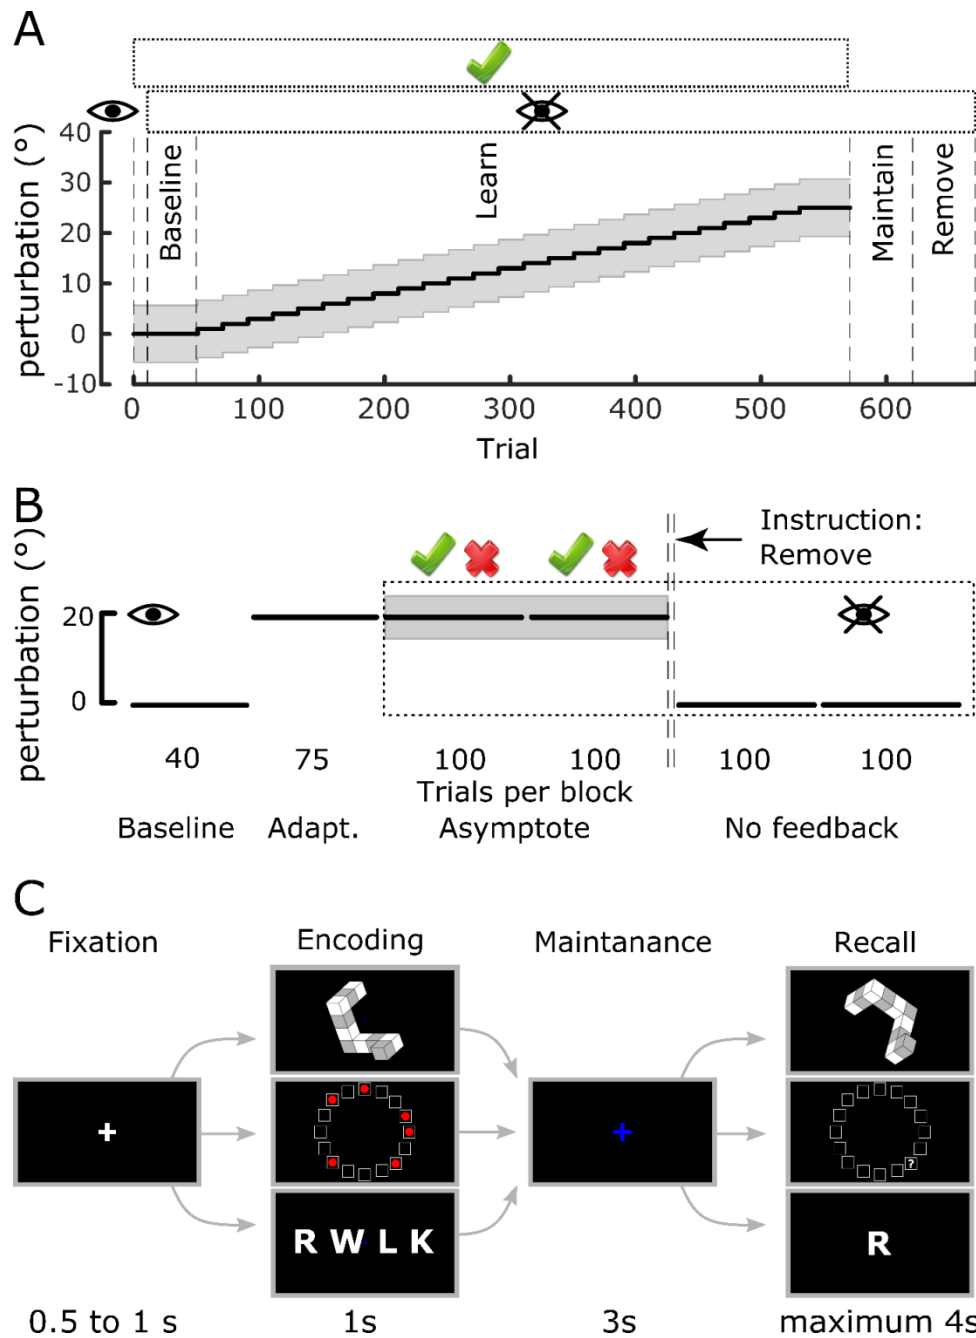

207

208 **Figure 1: Experimental design.** **A:** Time course of the Acquire task with the different  
 209 experimental periods labelled. The grey region represents the reward region, which gradually  
 210 rotated away from the visual target after the initial baseline period. The rectangle enclosing  
 211 the green tick above the axes represents trials in which reward was available, and the  
 212 rectangle with the ‘eye’ symbol indicates when vision was not available. **B:** Time course of  
 213 the Preserve task. After adapting to an initial rotation with vision available, vision was  
 214 removed (eye symbol) and reward-based feedback was introduced (tick and cross above the  
 215 axes). Prior to the no-feedback blocks participants were instructed to remove any strategy  
 216 they had been using. **C:** WM capacity tasks, the three tasks followed a stereotyped timeline  
 217 with only the items to be remembered differing. Each trial consisted of 4 phases (Fixation,  
 218 Encoding, Maintenance, and Recall) with the time allocated to each displayed below.  
 219

## 220 **Working memory tasks**

221 Participants performed three WM tasks, all of which followed the same design with the  
222 exception of the nature of the items to be remembered (Figure 1c). All WM tasks were run  
223 using Matlab (The Mathworks, Natwick, MA) and Psychophysics toolbox (Brainard, 1997).  
224 At the start of each trial, a white fixation cross was displayed in the centre of the screen for a  
225 period of 0.5 to 1s randomly generated from a uniform distribution (fixation period Figure  
226 1c). In the encoding period, the stimuli to be remembered was displayed for 1s and then  
227 subsequently replaced with a blue fixation cross for the maintenance period which persisted  
228 for 3s. Finally, during the recall period, participants were given a maximum of 4s to respond  
229 by pressing one of three keys on a keyboard with their dominant hand. The '1' key indicated  
230 that the stimuli presented in the recall period was a 'match' to that presented in the encoding  
231 period, the '2' key indicated a 'non-match' and pressing '3' indicated that the participant was  
232 unsure as to the correct answer. Each WM task contained 5 levels of difficulty with the 12  
233 trials presented for each; 6 of which were trials in which 'match' was the correct answer and  
234 6 in which 'non-match' was the correct answer. Consequently, each task consisted of 60 trials  
235 and the order in which the tasks were performed was pseudorandomised across participants.  
236 Prior to the start of each task participants performed 10 practice trials to familiarise  
237 themselves with the task and instructions. For both the Acquire and Preserve tasks, the WM  
238 tasks were performed in the same experimental session as the reaching. However, in the case  
239 of the Acquire task the WM tasks were performed after the reaching task whereas for the  
240 Preserve task the WM tasks were performed first.

241 In the rotation WM task (RWM, Figure 1c top row), the stimuli consisted of six 2D  
242 representations of 3D shapes drawn from an electronic library of the Shepard and Metzler  
243 type stimuli (Peters and Battista, 2008). The shape presented in the recall period was always  
244 the same 3D shape presented in the encoding period after undergoing a screen-plane rotation

245 of 60°, 120°, 180°, 240° or 300°. In ‘match’ trials, the only transform applied was the  
246 rotation; however, in ‘non-match’ trials an additional vertical-axis mirroring was also applied.  
247 The difficulty of mental rotation has been demonstrated to increase with larger angles of  
248 rotation (Shepard and Metzler, 1971) and therefore the different degrees of rotation  
249 corresponded to the 5 levels of difficulty. However, given the symmetry of two pairs of  
250 rotations (60 and 300, 120 and 240), these 5 levels were collapsed to 3 for analysis.

251 In the spatial WM task (SWM, Figure 1c middle row), stimuli in the encoding period  
252 consisted of a variable number of red circles placed within 16 squares arranged in a circular  
253 array (McNab and Klingberg, 2008). In the recall period, the array of squares was presented  
254 without the red circles and instead a question mark appeared in one of the squares.  
255 Participants then answered to the question “*Was there a red dot in the square marked by a*  
256 *question mark?*” by pressing a corresponding key. In ‘match’ trials the question mark  
257 appeared in one of the squares previously containing a red circle and in ‘non-match’ trials it  
258 appeared in a square that was previously empty. Difficulty was scaled by varying the number  
259 of red circles (i.e. the number of locations to remember) from 3 to 7.

260 In the verbal WM task (VWM, Figure 1c bottom row), participants were presented with a list  
261 of a variable number of consonants during the encoding period. In the recall period a single  
262 consonant was presented, and participants answered to the question “*Was this letter included*  
263 *in the previous array?*”. Thus, the letter could either be drawn from the previous list (‘match’  
264 trials) or have been absent from the previous list (‘non-match’ trials). Difficulty in this task  
265 was determined by the length of the list to be remembered, ranging from 5 to 9.

## 266 **Genetic sample collection and profiling**

267 COMT is thought to affect DA function mainly in the prefrontal cortex (Egan et al., 2001;  
268 Goldberg et al., 2003), a region known for its involvement in WM and strategic planning  
269 (Anguera et al., 2010; Doll et al., 2015), whereas DARPP32 and DRD2 act mainly in the

270 basal ganglia to promote exploitative behaviour, possibly by promoting selection of the  
271 action to be performed (Frank et al., 2009). Consequently, we focused here on SNPs related  
272 to those genes: RS4680 (COMT) and RS907094 (DARPP32). Regarding DRD2, there are  
273 two potential SNPs available, RS6277 and RS1800497. Although previous studies focusing  
274 on exploration and exploitation have assessed RS6277 expression (Doll et al., 2016; Frank et  
275 al., 2007, 2009), it should be noted that this SNP varies greatly across ethnic groups, with  
276 some allelic variations being nearly completely absent in non-Caucasian-European groups  
277 (e.g. see RS6277 in 1000 Genomes Project (The 1000 Genomes Project Consortium et al.,  
278 2015)). This has likely been inconsequential in previous work, as Caucasian-European  
279 individual represented the majority of sampled groups; here however, this represents a critical  
280 shortcoming, as we aim at investigating a larger and more representative population including  
281 other ethnic groups. Consequently, we based our analysis on the RS1800497 allele of the  
282 DRD2 gene (Pearson-Fuhrhop et al., 2013).

283 At the end of the task, participants were asked to produce a saliva sample which was  
284 collected, stabilized and transported using Oragene.DNA saliva collection kits (OG-500,  
285 DNAGENOTEK, Ontario, Canada). Participants were requested not to eat or drink anything  
286 except water for at least two hours before sample collection. Once data collection was  
287 completed across all participants, the saliva samples were sent to LGC (Hoddeson,  
288 Hertfordshire; <https://www.lgcgroup.com/>) for DNA extraction (per Oragene protocols:  
289 <https://www.dnagenotek.com/>) and genotyping. SNP genotyping was performed using the  
290 KASP SNP genotyping system. KASP is a competitive allele-specific PCR incorporating a  
291 FRET quencher cassette. Specifically, the SNP-specific KASP assay mix (containing two  
292 different, allele specific, competing forward primers) and the universal KASP master mix  
293 (containing FRET cassette plus Taq polymerase in an optimised buffer solution) were added  
294 to DNA samples and a thermal cycling reaction performed, followed by an end-point

295 fluorescent read according to the manufacturer’s protocol. All assays were tested on in-house  
296 validation DNA prior to being run on project samples. No-template controls were used, and  
297 5% of the samples had duplicates included on each plate to enable the detection of  
298 contamination or non-specific amplification. All assays had over 90% call rates. Following  
299 completion of the PCR, all genotyping reaction plates were read on a BMG PHERAStar plate  
300 reader. The plates were recycled until a laboratory operator was satisfied that the PCR  
301 reaction had reached its endpoint. In-house Kraken software then automatically called the  
302 genotypes for each sample, with these results being confirmed independently by two  
303 laboratory operators. Furthermore, the duplicate saliva samples collected from 5% of  
304 participants were checked for consistency with the primary sample. No discrepancies  
305 between primary samples and duplicates were discovered.

## 306 **Data analysis**

307 *Acquire task:* Reach trials containing MTs over 0.6s or less than 0.2s were removed from  
308 analysis (6.9% of trials). The end point angle of each movement was defined at the time when  
309 the radial distance of the cursor exceeded 10cm. This angle was defined in relation to the  
310 visible target with positive angles indicating clockwise rotations, end point angles and target  
311 angles for participants who experienced the counter clockwise rotations were sign-  
312 transformed. The explicit component of retention was defined as the difference between the  
313 mean reach angle of the maintain block and the remove block, while the implicit component  
314 was the difference between the mean reach angle of the remove block and baseline. If during  
315 the final 20 trials before the maintain block a participant achieved a mean reach angle within  
316 the reward region, participants were considered “*successful*” in learning the rotation; they  
317 were considered “*unsuccessful*” otherwise. For regression analysis a binary variable “*task*  
318 *success*” was defined as 1 and 0 for successful and unsuccessful participants, respectively. As  
319 in Holland et al (2018), for unsuccessful participants, the largest angle of rotation at which

320 the mean reach angle fell within the reward region was taken as the end of successful  
321 performance, and only trials prior to this point were included for further analysis. Success  
322 rate was defined as the percentage of trials during the learning blocks in which the end point  
323 angle was within the reward region. In order to examine the effect of reward on the change in  
324 end point angle on the subsequent trial, we calculated the absolute change in end point angle  
325 between consecutive trials (Holland et al., 2018; Sidarta et al., 2018; Therrien et al., 2016,  
326 2018). Subsequently we calculated the median absolute change in angle following rewarded  
327 trials ( $\Delta R$ ) and the median absolute deviation of these values (MAD [ $\Delta R$ ]). This analysis was  
328 repeated for the changes in angle following unsuccessful trials ( $\Delta P$  and MAD [ $\Delta P$ ]).

329 *Preserve task:* Reach trials containing MTs over 1s were removed from analysis (2.38% of  
330 trials). The end point angle for each movement was defined at the time that the radial distance  
331 of the cursor from the start position exceeded 8cm. Trials in which the error was greater than  
332  $80^\circ$  were excluded from further analysis (0.94% of trials). For each participant we plotted the  
333 reach error in one trial against the change in reach angle in the following trial for all trials in  
334 the adaptation block. The angle of the line of best fit was then used as the learning rate  
335 (Hutter and Taylor, 2018). Using this approach, a perfect adaptation leads to a value of -1,  
336 indicating that the error on a given trial is fully accounted for on the next trial. Overall this  
337 approach fitted the data well (mean  $R^2=0.5038$ ,  $SD=0.12$ ). As in Codol et al (2018), success  
338 rate, corresponding to percentage of rewarded trials, was measured separately in the first 30  
339 and last 170 trials of the asymptote blocks and labelled early and late success rate,  
340 respectively. This reflects a dichotomy between a dominantly exploration-driven early phase  
341 and a later exploitation-driven phase. Implicit retention was defined as the difference between  
342 the average baseline reach direction and the mean reach direction of the last 20 trials of the  
343 last no-feedback block (Codol et al., 2018). Analysis of changes in reach angle following  
344 rewarded trials were not pre-registered, but were included post-hoc.

345 *Exploratory analysis of reaching data:* In order to understand which outcome variables in the  
346 reaching tasks were predictive of overall task success, we split the learning period into two  
347 sections for every participant. We assessed trial-by-trial changes in end point angle in the first  
348 section, and compared them to success rate in the second section. For the Acquire task, we  
349 assessed trial-by-trial adjustments during the learning block, excluding the final 20 trials, and  
350 compared them to success rate in the last 20 trials of the learning block. In the Preserve task,  
351 we measured adjustments in the first 100 trials of the asymptote blocks and compared them to  
352 success rate in the last 100 trials of the asymptote blocks.

353 Two additional post-hoc stepwise regressions were performed on data from the Preserve task  
354 with early and late success rate the outcome variables and the same set of seven predictors  
355 (see statistical analysis section), however, in this case only data from participants with a  
356 success rate of greater than 40% was included (N=70).

357 *WM tasks:* WM performance was defined as the average percentage of correct responses  
358 across the 3 highest levels of difficulty for each task. In the case of the RWM task, the  
359 symmetrical arrangement of the angles of rotation in effect produced three levels of difficulty  
360 and therefore all trials were analysed.

361 *Genetics:* Genes were linearly encoded, with heterozygote alleles being 0, homozygote  
362 alleles bearing the highest dopaminergic state being 1, and homozygote alleles bearing the  
363 lowest dopaminergic state being -1 (Table 1). All groups were assessed for violations of the  
364 Hardy-Weinberg equilibrium. The participant pool in the Preserve task was in Hardy-  
365 Weinberg equilibrium for all three genes considered, even when restricted to the Caucasian-  
366 only subpopulation. In the Acquire task population, COMT and DRD2 were in Hardy-  
367 Weinberg equilibrium, but DARPP32 was not ( $p=0.002$ ), with too few heterozygotes.  
368 Therefore, the DARPP32 alleles were recoded, with the heterozygotes (0) and the smallest  
369 homozygote group (C:C, -1) combined and recoded as 0. In the analysis including only the



370 Caucasian subset, all three alleles were in the Hardy-Weinberg equilibrium, although  
371 combining the heterozygote and smallest homozygote group did not change the results.

372

373 **[Table 1]**

374

### 375 **Statistical analysis**

376 Regressions were performed using stepwise linear regressions (*stepwiselm* function in  
377 MatLab's *Statistics and Machine Learning Toolbox*), so as to select the most parsimonious  
378 model. In order to understand what genetic and WM factors are predictive of performance in  
379 the Acquire task, we performed a stepwise regression of the seven predictors (three allelic  
380 variations, three WM and ethnicity) onto each of several outcome measures representative of  
381 performance: success rate, implicit and explicit retention,  $\Delta R$ ,  $MAD[\Delta R]$ ,  $\Delta P$ ,  $MAD[\Delta P]$ . A  
382 stepwise logistic regression was employed for overall task success in the Acquire task. For  
383 the Preserve task, we performed separate stepwise regressions using the same seven  
384 predictors for the following outcome variables: baseline reach direction as a control variable,  
385 learning rate in the adaptation block, early and late success rate in the asymptote blocks (first  
386 30 and last 170 trials; Codol et al., 2018), retention in the no-feedback blocks, and  $\Delta R$  and  $\Delta P$   
387 during the asymptote blocks.

388 Prior to the regression analysis, all predictors and predicted variables were standardised (z-  
389 scored). For all non-ordinal variables, individual data were considered outliers if further than  
390 3 standard deviations from the mean and were removed prior to standardisation.  
391 Multicollinearity of predictors was also assessed before regression with Belsley Collinearity  
392 Diagnostics (*collintest* function in MatLab's *Econometrics Toolbox*) and no predictors were  
393 found to exhibit condition indexes over 30, indicating acceptable levels of collinearity. When

394 considering retention for both tasks, unsuccessful participants were removed from the  
395 regression analysis.

396 In order to quantify the predictive ability of the regression models 10-fold cross validation  
397 was performed on the model selected by the stepwise regression. Briefly, this consists of  
398 dividing the data samples into 10 evenly sized ‘folds’, the data from nine of the folds are used  
399 to create a regression model using ordinary least squares regression and this model is used to  
400 predict the values of data in the remaining fold given the values of the predictor variables.  
401 We measured the quality of the model fit in the 9 folds (In-sample) and the remaining fold of  
402 data (out-of-sample) by calculating the mean absolute error (MAE) of the predicted values  
403 from the real values. This process was repeated 1000 times for each model with the data  
404 assigned to each fold randomised on every iteration, we present the mean MAE  $\pm$  SD across  
405 the 1000 iterations.

406 *Exploratory mediation analysis:* We performed a mediation analysis to test if the relationship  
407 between SWM and SR was mediated by  $\Delta R$ . Our hypothesis was that higher SWM enables  
408 smaller changes after correct trials ( $\Delta R$ ) and this then explains the relationship between SWM  
409 and SR. To ensure that separate trials were used in the calculation of  $\Delta R$  and SR, we split the  
410 trials into two equally sized folds. The SR was then calculated for one fold as a percentage of  
411 correct trials, and  $\Delta R$  was calculated as the median change of reach angle after correct trials  
412 in the other fold. For the Acquire task only successful subjects were included in the mediation  
413 analysis. We employed Baron & Kenny’s three step mediation analysis (Baron and Kenny,  
414 1986): first regress SR on SWM, then regress  $\Delta R$  on SWM, and finally regress SR on both  
415 SWM and  $\Delta R$ . Subsequently, we performed a Sobel test to determine if there was a  
416 significant reduction in the relationship between SWM and SR when including  $\Delta R$ . The  
417 Sobel test examines if the amount of variance in SR explained by SWM is significantly  
418 reduced by including the mediator (Sobel, 1986). For a significant effect to be found, SWM

419 must be a significant predictor of  $\Delta R$  and  $\Delta R$  must also be a significant predictor of SR after  
420 controlling for the effect of SWM on SR. We repeated this procedure 1000 times with the  
421 allocation of trials to each fold randomised on each repetition. We present results in terms of  
422 the 95% confidence intervals for the  $R^2$  values for each of the regressions and the median p-  
423 value of the Sobel test, along with the associated 95% confidence intervals.

## 424 **Results**

### 425 **Acquire task**

426 In the Acquire task, participants had to learn to compensate and secretly shifting reward  
427 region in order to obtain successful feedback (Figure 2,3). As in Holland et al. (2018), about a  
428 quarter (28.1%) of participants failed to learn to compensate for the full extent of the rotation  
429 (Figure 3a). Successful participants retained most of the learnt rotation (mean  $80.7\% \pm 28.0\%$   
430 SD) in the maintain block. However, upon being asked to remove any strategy they had been  
431 employing, their performance returned to near-baseline levels. Consequently, a large explicit  
432 component to retention was found for successful participants (Figure 3b), whereas both  
433 successful and unsuccessful participants manifest a small but non-zero implicit component  
434 ( $t(86)=9.90$ ,  $p=7.43 \times 10^{-16}$ ,  $d=1.061$  and  $t(33)=4.53$ ,  $p=7.39 \times 10^{-5}$ ,  $d=0.776$ , respectively;  
435 Figure 3c). Furthermore, in accordance with Holland et al (2018), we found that participants  
436 made larger ( $t(120)=15.80$ ,  $p=4.32 \times 10^{-31}$ ,  $d=1.900$ ) and more variable changes in reach angle  
437 following unrewarded trials ( $t(120)=13.36$ ,  $p=1.68 \times 10^{-25}$ ,  $d=1.485$ ; Figure 3d-h), whereas in  
438 participants who would go on to fail, the post-error adjustments were smaller than in  
439 successful participants ( $t(119)=3.33$ ,  $p=0.001$ ,  $d=0.672$ ; Figure 3d). Changes following  
440 rewarded trials were similar between the groups ( $t(119)=0.71$ ,  $p=0.48$ ,  $d=0.143$ ; Figure 3f,g).  
441 The results obtained in this sample ( $N=121$ ) therefore replicate results from a previous study  
442 ( $N=30$ ) and provides further confirmation that performance in this task is fundamentally  
443 explicitly driven (Holland et al., 2018).

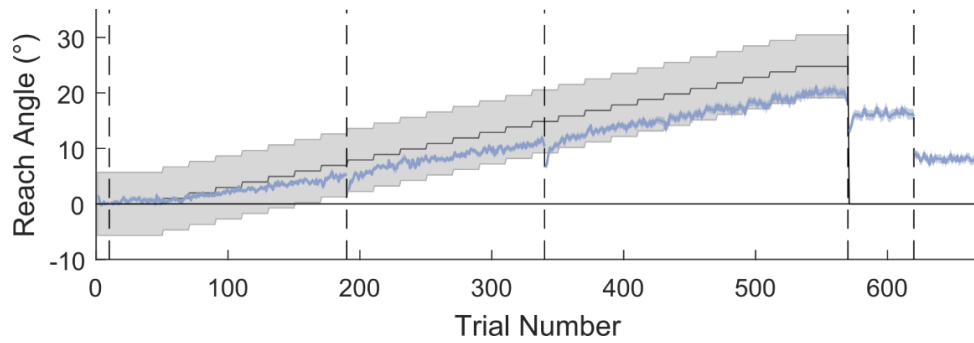

444

445 **Figure 2: Reaching performance in the Acquire task.** The grey region represents the  
446 gradually rotating rewarded region, the blue line represents mean reach angle for each trial,  
447 and the shaded blue region represent SEM. Vertical dashed lines represent different  
448 experiment blocks or breaks. Average performance for the full cohort falls within the reward  
449 region and demonstrates a clear reduction in reach angle when asked to remove strategy.  
450 N=121.

451

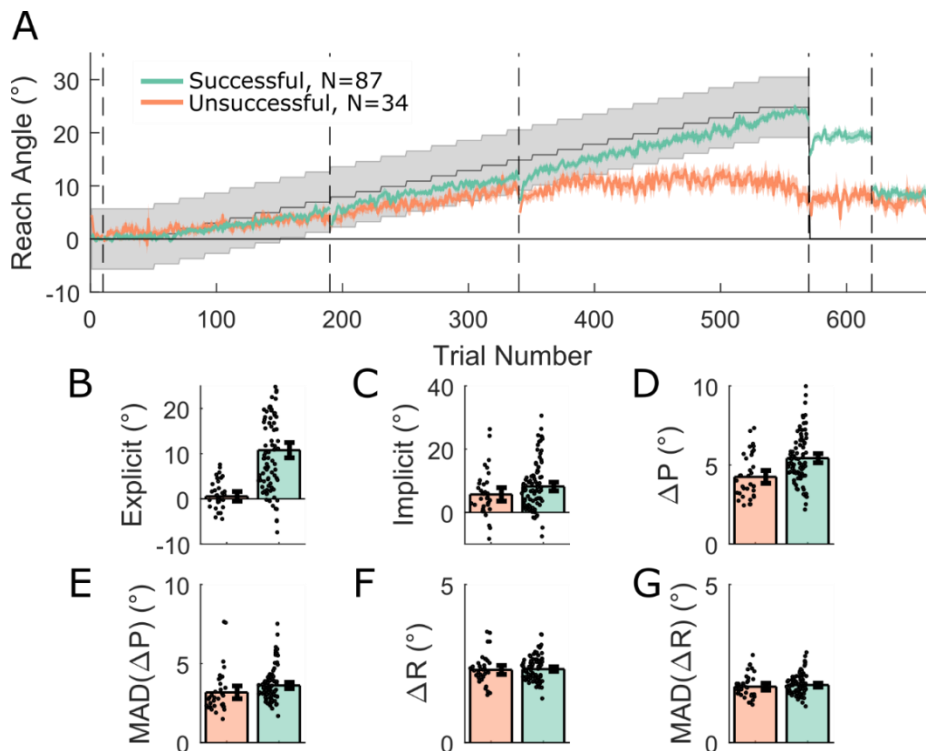

452

453 **Figure 3: Acquire task split by success at final angle.** **A:** Average reach angle for the  
454 successful (green) and unsuccessful (orange) groups, shaded regions represent SEM and grey  
455 shaded region represents the rewarded region. Despite similar initial performance, a clear

456 divergence can be seen between the two groups and an explicit component to retention is  
457 only visible in the successful group, whereas implicit retention is similar between groups. **B-**  
458 **G:** subplots displaying derived measures, which acted as outcome variables for the regression  
459 analysis, separated into successful and unsuccessful participants overlaid with individual data  
460 points. Error bars represent 95% bootstrapped confidence intervals.

461

462 In order to understand what genetic and WM factors are predictive of performance in the  
463 reaching task, we performed a stepwise regression of the seven predictors (three allelic  
464 variations, three WM and ethnicity) onto each of several outcome measures representative of  
465 performance: success rate, implicit and explicit retention,  $\Delta R$ ,  $MAD[\Delta R]$ ,  $\Delta P$ ,  $MAD[\Delta P]$ .  
466 Additionally, we performed a stepwise logistic regression of the predictors onto a binary  
467 variable encoding if a participant successfully learnt the full rotation (1) or not (0). The  
468 logistic regression showed no significant predictors of task success, that is, of being able to  
469 follow the shifting reward region until the end of the learning block. However, higher SWM  
470 was predictive of an increased success rate (percentage of correct trials;  $\beta=0.416$ ,  $p=2.95 \times 10^{-6}$ ).  
471 <sup>6</sup>). To ensure that the relationship between SWM and success rate was not due to failure at a  
472 later point in the task, success rate was measured during the initial period in which subjects  
473 who could not fully account for the displacement are still successful; for those who could, the  
474 full learning block was included. Next, retention was assessed by splitting up the explicit and  
475 implicit components such as in Holland et al. (2018). No predictor was related to the implicit  
476 component, but the explicit component was strongly and positively associated with RWM  
477 ( $\beta=0.373$ ,  $p=1.78 \times 10^{-4}$ ). These results suggest positive relationships for both RWM and SWM  
478 with task performance: greater RWM predicts a greater contribution of explicit processes to  
479 learning, whereas greater SWM predicts a greater percentage of correct trials.

480

481

[Table 2]

482

483 In Holland et al (2018), the amplitude of the changes in reach angle participants made  
484 following unrewarded trials was found to be predictive of task success, that is, greater  $\Delta P$  was  
485 predictive of an increased chance of overall task success. Thus it could be that RWM and  
486 SWM, that are shown to associate with performance in this study, are themselves predictors  
487 of changes in reach angle. The regression results demonstrated that a large  $\Delta R$  was inversely  
488 related to SWM ( $\beta=-0.251$ ,  $p=0.006$ ), as was  $MAD[\Delta R]$  ( $\beta=-0.283$ ,  $p=0.002$ ). The results  
489 indicate that greater SWM was predictive of smaller and less variable changes in reach angle  
490 after successful trials, suggesting high SWM enables the maintenance of rewarding reach  
491 angles. It was also found that the variability of changes in reach angle after unrewarded trials  
492 ( $MAD[\Delta P]$ ) was negatively predicted by RWM ( $\beta=-0.236$ ,  $p=0.011$ ). This result was  
493 unexpected as it suggests that greater WM capacity predicts smaller changes following  
494 unrewarded trials, whereas previous results suggest a positive relationship between these  
495 changes and overall task success. Finally, to ensure the robustness of the results, we tested  
496 whether retaining only the largest ethnic group in our population (i.e. Caucasian,  $N=82/121$ )  
497 produced the same results as was observed with the full participant pool. In accordance with  
498 the full sample, all previously described relationships were also found in the Caucasian only  
499 subset (Table 2).

500 Overall, WM (in particular RWM and SWM) successfully predicted various aspects of  
501 performance in the Acquire task, while genetic predictors failed to do so. Specifically, greater  
502 SWM predicted smaller and less variable changes after correct trials. This suggests that SWM  
503 underlies one's capacity to preserve and consistently express an acquired reach direction to  
504 obtain reward. Furthermore, SWM also directly predicted success rate. In addition, greater  
505 RWM was a strong predictor of explicit control. The inverse relationship between RWM and

506 the variability of changes after unrewarded trials was unexpected. However, one possible  
507 explanation is that participants with poorer WM capacity make larger errors which require  
508 larger corrections. Restricting our group to Caucasians showed that these effects are robust to  
509 ethnicity.

510

### 511 **Preserve task**

512 In this task, we addressed how well participants can maintain a previously learnt adaptation  
513 after transitioning to binary feedback. As participants are unable to compensate for a large  
514 abrupt displacement of a hidden reward region (van der Kooij and Overvliet, 2016; Manley et  
515 al., 2014), participants first adapted to an abruptly introduced 20° clockwise rotation with full  
516 vision of the cursor available. Subsequently, visual feedback of the cursor position was  
517 replaced with binary feedback; participants were rewarded if they continued reaching towards  
518 the same angle that resulted in the cursor hitting the target during the adaptation phase.  
519 Overall, participants adapted to the visuomotor rotation successfully (Figure 4,5a-c) before  
520 transitioning to the binary feedback-based asymptote blocks. However, from the start of the  
521 asymptote blocks onward, participants exhibited very poor performance, expressing an  
522 average  $45.0 \pm 24.2$  SD% success rate when considering all 200 asymptote trials (Figure 4,5a,  
523 d,e). Separating successful and unsuccessful participants (40% success rate cut-off; Figure  
524 5a) revealed that successful participants expressed behaviour greatly similar to that observed  
525 in Codol et al. (2018), in which unsuccessful participants were excluded, using the same cut-  
526 off (40% success rate). The ‘spiking’ behaviour observed in reach angles during the  
527 asymptote blocks (Figure 5a) is due to the presence of the ‘refresher’ trials, with the large  
528 positive changes in reach angle corresponding to trials immediately following the refresher  
529 trials. This pattern of behaviour is particularly pronounced in the unsuccessful participants.  
530 Finally, participants demonstrated at least a residual level of retention even after being

531 instructed to remove any strategy they had employed ( $t(69)=7.268$ ,  $p=3.345 \times 10^{-10}$ ,  $d=0.869$ ;  
532 Figure 5a,f). Therefore, the results obtained in this sample ( $N=120$ ) replicate results from a  
533 previous study (Codol et al., 2018;  $N=20$ , BF-Remove group) and provides further  
534 confirmation that performance in this task is fundamentally explicitly driven. As with the  
535 Acquire task successful participants displayed larger changes in angle after unrewarded trials  
536 than their unsuccessful counterparts ( $t(117)=3.847$ ,  $p=1.952 \times 10^{-4}$ ,  $d=0.717$ ; Figure 5h).  
537 However, in contrast to the Acquire task, successful participants also displayed smaller  
538 changes in angle after rewarded trials ( $t(115)=-7.534$ ,  $p=1.218 \times 10^{-11}$ ,  $d=1.421$ ; Figure 5g).

539  
540  
541  
542

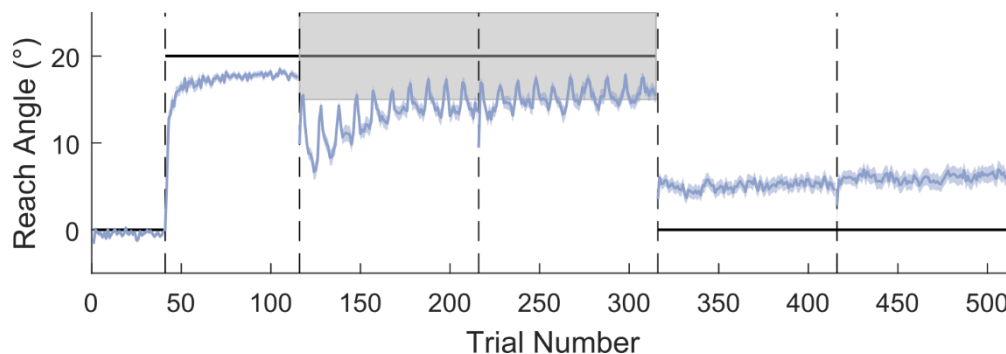

543  
544  
545  
546  
547  
548  
549  
550  
551

**Figure 4: Reaching performance in the Preserve task.** The grey shaded area represents the rewarded region, and the thick black line represents the perturbation. The vertical dashed lines represent block limits. The blue line indicates mean reach angle for every trial and blue shaded areas represent SEM. After successfully adapting to the visuomotor rotation performance deteriorates at the onset of binary feedback, subsequently success rate increases towards the end of the asymptote blocks. Following the removal of all feedback, and the instruction to remove any strategy, a small amount of implicit retention remains.  $N=120$ .



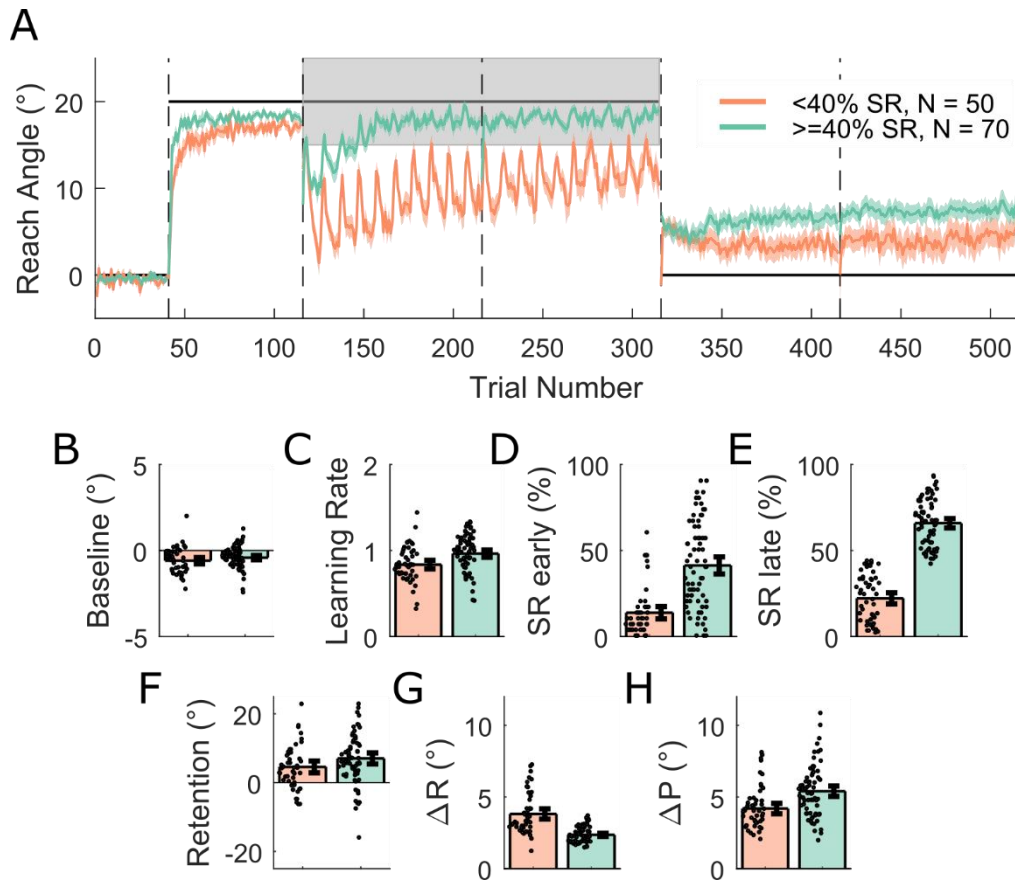

552

553 **Figure 5: Preserve task split into two groups on the basis of success rate.** A: Shaded  
554 regions represent SEM. B-H: Derived variables, which acted as outcome variables for the  
555 regression analysis, for the two groups, error bars on the bars represent 95% bootstrapped  
556 confidence intervals and individual data points are displayed. SR: success rate.

557

558 As in the Acquire task, we examined if performance in any of the WM tasks or genetic  
559 profile could predict participant's behaviour in the reaching task. We performed separate  
560 stepwise regressions for the following outcome variables: baseline reach direction as a  
561 control variable, learning rate in the adaptation block, early and late success rate in the  
562 asymptote blocks (first 30 and last 170 trials; Codol et al., 2018), retention in the no-feedback  
563 blocks, and  $\Delta R$  and  $\Delta P$  during the asymptote blocks. The most striking result was that both  
564 early and late success rate could be reliably predicted by RWM (early:  $\beta=0.255$ ,  $p=0.005$ ;  
565 late:  $\beta=0.287$ ,  $p=0.002$ ; Table 3), with greater RWM associated with increased success rates.

566

567

**[Table 3]**

568

569 Genetic profile did not predict any aspect of performance, analogous to the Acquire task. In  
570 contrast, greater SWM successfully predicted reduced  $\Delta R$  ( $\beta=-0.194$ ,  $p=0.036$ ), similarly to  
571 the Acquire task. Finally, retention values were surprisingly predicted by ethnicity ( $\beta=-0.528$ ,  
572  $p=0.037$ ). Due to the existence of a relationship between ethnicity and retention, we  
573 performed the same analysis as in the Acquire task, that is, we tested if our observed results  
574 hold if only our largest ethnic group (Caucasian,  $N=85/120$ ) was considered. In accordance  
575 with the result for the full population, the positive relationship between late success rate and  
576 RWM was again observed ( $\beta=0.232$ ,  $p=0.031$ ). However, the SWM- $\Delta R$  and RWM-early  
577 success rate relationships were no longer observed in this smaller subset of the population.  
578 Interestingly, retention was now predicted by a genetic variable, DARPP32 ( $\beta=-0.214$ ,  
579  $p=0.040$ ), suggesting that less dopaminergic metabolism leads to better retention. This last  
580 result again suggests a possible confound, that is, that DARPP32 allelic distribution was  
581 different across ethnic groups. However, a  $\chi^2$  test analysis demonstrated that DARPP32  
582 alleles were evenly distributed between the Caucasian and non-Caucasian group, ruling out  
583 this possibility ( $\chi^2=2.578$ ,  $p=0.276$ ). As a post-hoc analysis we performed the same stepwise  
584 regressions for the outcome variables success rate early and success rate late but restricted to  
585 participants with an overall success rate of greater than 40%. Although we found no  
586 predictors of early success rate, we did find that higher SWM was predictive of a higher late  
587 success rate ( $\beta=0.156$ ,  $p=0.026$ ). This result is in contrast to the relationship of RWM to late  
588 success rate when including all participants.

589 Overall the regression results fit a pattern similar to that found for the Acquire task with  
590 greater RWM predicting improved performance on the reaching task and greater SWM

591 predicting smaller changes in reach angle after rewarded trials. However, in the Preserve task  
592 in one specific instance we did observe a genetic predictor of performance.

593

#### 594 **Cross validation analysis**

595 To test the predictive ability of the regression models we performed 10-fold cross validation  
596 on the final model selected by the stepwise regression process. The quality of the in-sample  
597 and out-of-sample fits was assessed by calculating the MAE. From Tables 2 and 3 it can be  
598 seen that although the out-of-sample MAE is consistently higher than that of the  
599 corresponding in-sample, all differences are less than 0.1 and all of out-of-sample MAEs are  
600 below 1. As both the predictor and outcome variables are standardised this indicates that the  
601 mean error of the prediction was less than 1 standard deviation of the outcome variable, and  
602 the small increases observed between the in-sample and out-of-sample indicates that the  
603 models make accurate predictions when confronted with data on which they were not trained.

604

#### 605 **Exploratory analysis**

606 As a relationship exists between SWM and  $\Delta R$  in both the Acquire and Preserve paradigms,  
607 we ran exploratory regressions to assess the relationship between  $\Delta R$  and success rate across  
608 both tasks. Since  $\Delta R$  and success rate are conceptually strongly related variables, and  
609 measuring on the same data set would render them non-independent, we split each  
610 individual's reaching data into two sections and assessed whether  $\Delta R$  or  $\Delta P$  in the first  
611 section could reliably predict success rate in the second (see methods for details). Although  
612 we found no predictors of  $\Delta P$  in our primary analysis, results here in combination with  
613 previous work (Holland et al., 2018) has demonstrated a link between  $\Delta P$  and task success,  
614 with a greater  $\Delta P$  indicative of greater success. Therefore, we also performed the same  
615 analysis for  $\Delta P$ .

616

617

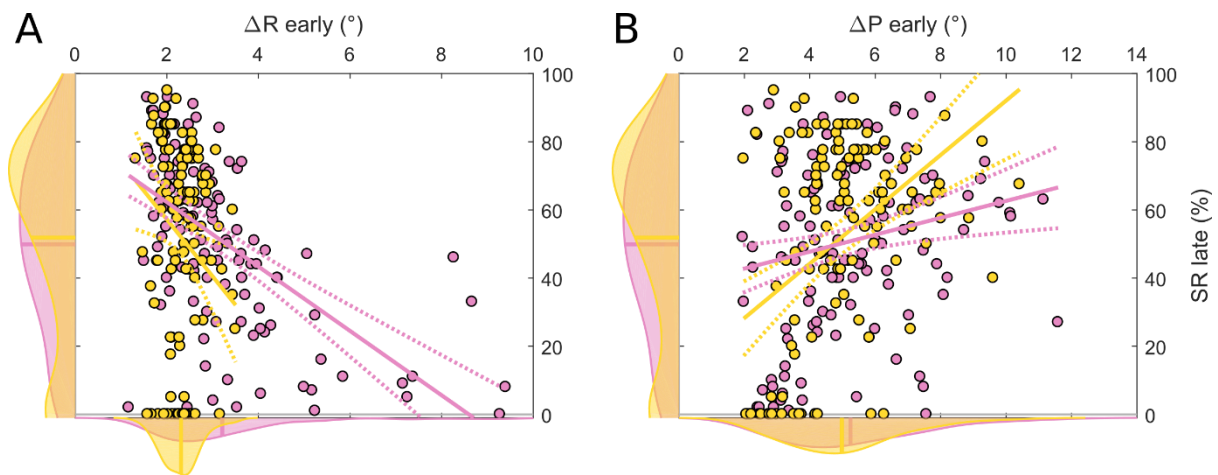

618

619 **Figure 6: Slice plots showing regression results for prediction of late success rate (SR)**  
620 **by changes in reach angle following rewarded (A) and unrewarded (B) trials during the**  
621 **early learning period.** The central axis of each panel displays the individual data from the  
622 Acquire (yellow) and Preserve (pink) task, the smoothed distribution of the data in each  
623 dimension is displayed on the corresponding axis. Solid lines represent the prediction of the  
624 regression model when the other predictor is held at its mean value.

625

[Table 4]

626

627 In the Acquire task,  $\Delta R$  and  $\Delta P$  in the first section of learning trials predicted success rate in  
628 the final twenty trials, though  $\Delta P$  appeared as the strongest predictor ( $\Delta R$ :  $\beta=-0.274$ ,  $p=0.015$ ;  
629  $\Delta P$ :  $\beta=0.581$ ,  $p=3.89 \times 10^{-6}$ ; Figure 6a,b, yellow; Table 4). Similarly, for the Preserve task  $\Delta R$   
630 and  $\Delta P$  in the first half of asymptote trials predicted success rate in the second half ( $\Delta R$ :  $\beta=-$   
631  $0.750$ ,  $p=1.07 \times 10^{-12}$ ;  $\Delta P$ :  $\beta=0.229$ ,  $p=0.007$ ; Figure 6a,b, pink; Table 4). In both tasks, the  
632 directions of these relationships were opposite; greater success rate was predicted by smaller  
633 changes following rewarded trials and greater changes following unrewarded trials. In  
634 summary, we found that for both tasks the magnitude of changes in behaviour in response to

635 rewarded and unrewarded trials early in learning were strongly predictive of future task  
636 success across both the Acquire and Preserve tasks.

637

### 638 **Mediation analysis**

639 To test whether the effect observed between SWM and SR was explained by an indirect  
640 effect through  $\Delta R$ , we performed an exploratory mediation analysis on both tasks. For both  
641 the Acquire and Preserve tasks, the results indicate a significant proportion (median  
642  $p=7.10 \times 10^{-4}$  and  $p=0.04$  respectively) of the relationship between SWM and SR can be  
643 explained by a mediation from SWM via  $\Delta R$  to SR. However, in the case of the Acquire task,  
644 a significant relationship between SWM and SR still exists, indicating that not all of the  
645 effect of SWM on SR could be explained by the indirect pathway. Whereas, in the Preserve  
646 task the SWM- $\Delta R$  relationship is weaker and was not significant on every repetition,  
647 occasionally leading to an insignificant mediation effect, despite the median p-value  
648 indicating an effect when considering all repetitions.

649

650

651

652

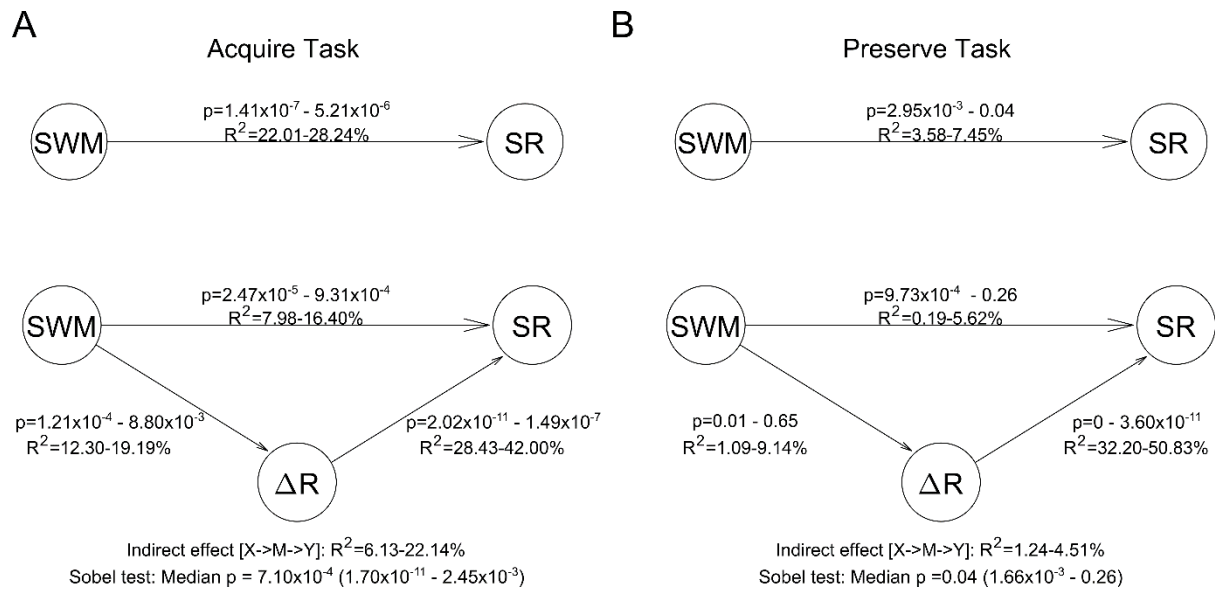

653

654 **Figure 7. Mediation Analysis for both the Acquire (A) and Preserve (B) tasks.** The

655 numbers associated with each arrow display the 95% confidence intervals for each of the

656 relationships ( $R^2$  and p-values) across the 1000 repetitions. Below the figure, the results of

657 the Sobel test are displayed indicating the amount of variance explained by the indirect

658 pathway and the 95% confidence intervals and median p-value.

659

## 660 Discussion

661 In this study, we sought to identify if genetic background or specific domains of WMC could

662 explain the variability observed in performance levels during reward-based motor learning

663 tasks. We found that RWM and SWM predicted different aspects of the Acquire and Preserve

664 tasks, whereas VWM did not relate to any performance measure. Specifically, RWM

665 predicted the explicit component of retention in the Acquire task and success rate in the

666 Preserve task, whereas SWM predicted success rate in the Acquire task and  $\Delta R$  in both tasks.

667 Conversely, allelic variations of the three dopamine-related genes (DRD2, COMT and

668 DARPP32) did not predict any behavioural variables in the full sample of participants. This

669 suggests that SWM predicts a participant's capacity to reproduce a rewarded motor action,

670 while RWM predicts a participant's ability to express an explicit strategy when making large  
671 behavioural adjustments. Therefore, we conclude that WMC plays a pivotal role in  
672 determining individual ability in reward-based motor learning.

673

674 Recently, Wong et al. (2019) describe a positive relationship between SWM and the  
675 development of explicit strategies in visuomotor adaptation, complimenting previous reports  
676 (Anguera et al., 2012; Christou et al., 2016). However, in contrast to the current findings the  
677 previous experiments employed relatively small sample sizes, which may render correlations  
678 unreliable. The large group sizes employed here and the confirmation of relationships across  
679 two tasks provides strong evidence that these relationships are robust, replicable, and extend  
680 from visuomotor adaptation to reward-based motor learning. An interesting dichotomy was  
681 the reliance on SWM and RWM for the Acquire and Preserve task, respectively. The  
682 Preserve task required the maintenance of a large, abrupt behavioural change, whereas the  
683 Acquire task required the gradual adjustment of behaviour considering the outcomes of recent  
684 trials. Therefore, RWM may underscore one's capacity to express a large correction  
685 consistently over trials with binary feedback, whereas SWM reflects one's capacity to  
686 maintain a memory of previously rewarded actions and adjust behaviour accordingly.  
687 Conformingly, the magnitude of  $\Delta R$  was negatively related to SWM but not RWM in both  
688 tasks, suggesting high SWM enables the maintenance of rewarding actions. Supporting this,  
689 Sidarta et al. (2018) report that higher SWM associated with reduced movement variability in  
690 a reward-based motor learning task. Additionally, explicit retention, an element of the  
691 Acquire task requiring a large, sudden change in reach direction, was predicted not by RWM  
692 not SWM.

693

694 A notable feature of the Preserve task is the “spiking” behaviour observed immediately  
695 following ‘refresher’ trials, suggesting a central role of ‘refresher’ trials in binary feedback-  
696 based performance when included (Codol et al., 2018; Shmuelof et al., 2012). The transient  
697 nature of this decrease in error demonstrates this is insufficient to promote generalisation to  
698 binary feedback trials, at least in unsuccessful participants. It remains an open question  
699 whether superior performance of successful participants was partly due to a capacity to  
700 generalise information from ‘refresher’ trials. McDougle and Taylor (2019) provided  
701 evidence that two separate strategies are employed in visuomotor adaptation; response-  
702 caching and mental rotation. The balance between the two strategies is a function of task  
703 demands. It could be that the relationships between RWM and SWM to success rate in the  
704 Preserve and Acquire tasks respectively reflect a different balance of the use of these  
705 strategies; visual feedback in ‘refresher’ trials in the Preserve task encourages the  
706 engagement of mental rotation processes, whereas the slow updating of behaviour in the  
707 Acquire task in the absence of visual feedback engages the response-caching memory system.  
708 This would imply that response-caching is associated with SWM.

709

710 Surprisingly, although  $\Delta P$  was a strong predictor of success in both tasks, it was not predicted  
711 by any genetic variable. In the Acquire task  $MAD(\Delta P)$  was inversely predicted by RWM.  
712 This result is surprising given the positive relationship between  $\Delta P$  and success rate in both  
713 tasks. Whilst no predictor of  $\Delta P$  was found in the Preserve task,  $\Delta P$  is however likely  
714 important for explicit control, as errors are a central element leading to the induction of  
715 structural learning in reward-based tasks, reinforcement learning (Daw et al., 2011; Manley et  
716 al., 2014; Sutton and Barto, 1998) and motor learning in general (Maxwell et al., 2001;  
717 Sidarta et al., 2018).

718



719 If RWM is important for explicit control and the main element predicting success in the  
720 Preserve task, this raises the question as to whether gradual designs (as in the Acquire task)  
721 are more suitable to engage implicit reinforcement learning, at least initially. However, the  
722 Acquire task still bears a strong explicit component (Holland et al., 2018). How can these two  
723 views be reconciled? In reward-based motor learning tasks, it is generally agreed that  
724 participants begin to reflect upon task structure and develop strategies upon encountering  
725 negative outcomes (Leow et al., 2016; Loonis et al., 2017; Manley et al., 2014; Maxwell et al.,  
726 2001), which occurs nearly immediately in the Preserve task after the introduction of binary  
727 feedback, due to a lack of generalisation of cerebellar memory (Codol et al., 2018). In  
728 contrast, in the Acquire task, participants experience an early learning phase with mainly  
729 rewarding outcomes, possibly suppressing development of explicit control and allowing for  
730 this early window of implicit reward-based learning. Other studies have demonstrated that  
731 minor adjustments in reach direction under reward-based feedback can occur, though none  
732 has assessed their explicitness directly in the very early stages, such as about 1-4° (Izawa and  
733 Shadmehr, 2011; Pekny et al., 2015; Therrien et al., 2016). Notably, Izawa and Shadmehr,  
734 (2011) observed that after 8° shifts of a similarly-sized reward region, participants indeed  
735 noticed the perturbation, but awareness was not assessed for smaller shifts.

736

737 In Holland et al., (2018), the addition of a RWM-like dual-task was very effective in  
738 preventing explicit control, leading to participants invariably failing at the reaching task. It  
739 may therefore appear as surprising that RWM does not predict success rate in the Acquire  
740 task. A possible explanation is that RWM and SWM share the same memory buffer (Anguera  
741 et al., 2010; Beschin et al., 2005; Cohen et al., 1996; Jordan et al., 2001; Suchan et al., 2006).  
742 Similarly, in force-field adaptation the early component of adaptation – considered as bearing  
743 a strong explicit element – is selectively disrupted with a VWM dual-task (Keisler and

744 Shadmehr, 2010). However, we found no relationships with VWM in our reward-based  
745 motor tasks. It may be possible that reward-based motor performance relies more on spatial  
746 instances of WM as opposed to tasks such as force-field adaptation.

747

748 The absence of DA-related genetic relationships with behaviour is a surprising result as a  
749 substantial body of literature points to a relationship between dopamine and performance in  
750 reward-based tasks, including those with motor components (Deserno et al., 2015; Doll et al.,  
751 2016; Frank et al., 2007, 2009; Gershman and Schoenbaum, 2017; Izawa and Shadmehr,  
752 2011; Nakahara and Hikosaka, 2012; Pekny et al., 2015; Therrien et al., 2016). There exists a  
753 growing appreciation of the links between decision-making and motor learning (Chen et al.,  
754 2018; Haith and Krakauer, 2013). Chen et al., (2017) demonstrated that exploratory motor  
755 learning can be modelled as a sequential decision-making process, with individual's  
756 explorative drive shared between motor and decision-making tasks. However, the results  
757 presented here suggest that genetic predictors of exploration and exploitation in decision-  
758 making tasks are not also predictive of similar behaviours in reward-based motor learning.

759

760 Our sample sizes were defined *a priori* for 90% power based on previous work (Doll et al.,  
761 2016; Frank et al., 2009; see pre-registrations), therefore they are unlikely to be  
762 underpowered. Another possibility is that we employed the wrong variables to assess  
763 behaviour. However, given the informative and coherent relationships between WM and  
764 motor learning and the ability to predict overall performance on that basis, could it be that the  
765 genes we selected do not relate in any meaningful way to performance in these reward-based  
766 tasks? In line with this, a recent study showed that DA pharmacological manipulation did not  
767 alter reward effects in a visuomotor adaptation task (Quattrocchi et al., 2018). However,  
768 previous work has shown that Parkinson's disease patients show impaired reward-based

769 motor performance (Pekny et al., 2015). It is possible that genetic variations may not impact  
770 reward-based motor learning significantly, especially compared to the wide depletion of  
771 dopaminergic neurons in Parkinson's disease. Finally, future work should also address the  
772 possible involvement of other neuromodulators, such as acetylcholine, norepinephrine and  
773 serotonin (for a review, see Dash et al., 2007), in reward-based motor learning.

774

775 In summary, despite employing two distinct tasks and an independent participant pool on  
776 different devices, we find strikingly similar results in reward-based motor learning. While  
777 SWM strongly predicted a participant's capacity to reproduce successful motor actions,  
778 RWM predicted a participant's ability to express an explicit strategy when required to make  
779 large behavioural adjustments. Therefore, both SWM and RWM are reliable predictors of  
780 success during reward-based motor learning. Surprisingly, no dopamine-related genotypes  
781 predicted performance. Therefore, WMC plays a pivotal in determining individual ability in  
782 reward-based motor learning. This could have important implications when using reward-  
783 based feedback in applied settings as only a subset of the population may benefit.

784

## 785 **References**

- 786 Anguera, J.A., Reuter-Lorenz, P.A., Willingham, D.T., and Seidler, R.D. (2010).  
787 Contributions of spatial working memory to visuomotor learning. *Journal of Cognitive*  
788 *Neuroscience* 22, 1917–1930.
- 789 Anguera, J.A., Bernard, J.A., Jaeggi, S.M., Buschkuhl, M., Benson, B.L., Jennett, S.,  
790 Humfleet, J., Reuter-Lorenz, P.A., Jonides, J., and Seidler, R.D. (2012). The effects of  
791 working memory resource depletion and training on sensorimotor adaptation. *Behavioural*  
792 *Brain Research* 228, 107–115.
- 793 Baron, R.M., and Kenny, D.A. (1986). The Moderator-Mediator Variable Distinction in

- 794 Social Psychological Research: Conceptual, Strategic, and Statistical Considerations. *Journal*  
795 *of Personality and Social Psychology* *51*, 1173–1182.
- 796 Beschin, N., Denis, M., Logie, R.H., and Della Sala, S. (2005). Dissociating mental  
797 transformations and visuo-spatial storage in working memory: Evidence from  
798 representational neglect. *Memory* *13*, 430–434.
- 799 Bond, K.M., and Taylor, J.A. (2015). Flexible explicit but rigid implicit learning in a  
800 visuomotor adaptation task. *Journal of Neurophysiology* *113*, 3836–3849.
- 801 Brainard, D.H. (1997). The Psychophysics Toolbox. *Spat Vis* *10*, 433–436.
- 802 Chen, X., Mohr, K., and Galea, J.M. (2017). Predicting explorative motor learning using  
803 decision-making and motor noise. *PLOS Computational Biology* *13*, e1005503.
- 804 Chen, X., Holland, P., and Galea, J.M. (2018). The effects of reward and punishment on  
805 motor skill learning. *Current Opinion in Behavioral Sciences* *20*, 83–88.
- 806 Christou, A.I., Miall, R.C., McNab, F., and Galea, J.M. (2016). Individual differences in  
807 explicit and implicit visuomotor learning and working memory capacity. *Scientific Reports* *6*.
- 808 Codol, O., Holland, P.J., and Galea, J.M. (2018). The relationship between reinforcement and  
809 explicit control during visuomotor adaptation. *Scientific Reports* *8*.
- 810 Cohen, M.S., Kosslyn, S.M., Breiter, H.C., DiGirolamo, G.J., Thompson, W.L., Anderson,  
811 A.K., Bookheimer, S.Y., Rosen, B.R., and Belliveau, J.W. (1996). Changes in cortical  
812 activity during mental rotation A mapping study using functional MRI. *Brain* *119*, 89–100.
- 813 Dash, P.K., Moore, A.N., Kobori, N., and Runyan, J.D. (2007). Molecular activity underlying  
814 working memory. *Learning & Memory* *14*, 554–563.
- 815 Daw, N.D., Niv, Y., and Dayan, P. (2005). Uncertainty-based competition between prefrontal  
816 and dorsolateral striatal systems for behavioral control. *Nat. Neurosci.* *8*, 1704–1711.

- 817 Daw, N.D., Gershman, S.J., Seymour, B., Dayan, P., and Dolan, R.J. (2011). Model-Based  
818 Influences on Humans' Choices and Striatal Prediction Errors. *Neuron* 69, 1204–1215.
- 819 Deserno, L., Huys, Q.J.M., Boehme, R., Buchert, R., Heinze, H.-J., Grace, A.A., Dolan, R.J.,  
820 Heinz, A., and Schlagenhauf, F. (2015). Ventral striatal dopamine reflects behavioral and  
821 neural signatures of model-based control during sequential decision making. *Proceedings of*  
822 *the National Academy of Sciences* 112, 1595–1600.
- 823 Doll, B.B., Duncan, K.D., Simon, D.A., Shohamy, D., and Daw, N.D. (2015). Model-based  
824 choices involve prospective neural activity. *Nature Neuroscience* 18, 767–772.
- 825 Doll, B.B., Bath, K.G., Daw, N.D., and Frank, M.J. (2016). Variability in Dopamine Genes  
826 Dissociates Model-Based and Model-Free Reinforcement Learning. *Journal of Neuroscience*  
827 36, 1211–1222.
- 828 Egan, M.F., Goldberg, T.E., Kolachana, B.S., Callicott, J.H., Mazzanti, C.M., Straub, R.E.,  
829 Goldman, D., and Weinberger, D.R. (2001). Effect of COMT Val108/158 Met genotype on  
830 frontal lobe function and risk for schizophrenia. *Proceedings of the National Academy of*  
831 *Sciences* 98, 6917–6922.
- 832 Frank, M.J., Moustafa, A.A., Haughey, H.M., Curran, T., and Hutchison, K.E. (2007).  
833 Genetic triple dissociation reveals multiple roles for dopamine in reinforcement learning.  
834 *Proceedings of the National Academy of Sciences* 104, 16311–16316.
- 835 Frank, M.J., Doll, B.B., Oas-Terpstra, J., and Moreno, F. (2009). Prefrontal and striatal  
836 dopaminergic genes predict individual differences in exploration and exploitation. *Nature*  
837 *Neuroscience* 12, 1062–1068.
- 838 Gershman, S.J., and Schoenbaum, G. (2017). Rethinking dopamine prediction errors.  
839 *BioRxiv* 239731.
- 840 Goldberg, T.E., Egan, M.F., Gscheidle, T., Coppola, R., Weickert, T., Kolachana, B.S.,

- 841 Goldman, D., and Weinberger, D.R. (2003). Executive Subprocesses in Working Memory:  
842 Relationship to Catechol-O-methyltransferase Val158Met Genotype and Schizophrenia. *Arch*  
843 *Gen Psychiatry* 60, 889–896.
- 844 Haith, A.M., and Krakauer, J.W. (2013). Model-Based and Model-Free Mechanisms of  
845 Human Motor Learning. In *Progress in Motor Control*, M.J. Richardson, M.A. Riley, and K.  
846 Shockley, eds. (New York, NY: Springer New York), pp. 1–21.
- 847 Holland, P.J., Codol, O., and Galea, J.M. (2018). The contribution of explicit processes to  
848 reinforcement-based motor learning. *Journal of Neurophysiology*.
- 849 Huang, V.S., Haith, A., Mazzoni, P., and Krakauer, J.W. (2011). Rethinking Motor Learning  
850 and Savings in Adaptation Paradigms: Model-Free Memory for Successful Actions Combines  
851 with Internal Models. *Neuron* 70, 787–801.
- 852 Hutter, S.A., and Taylor, J.A. (2018). Relative sensitivity of explicit re-aiming and implicit  
853 motor adaptation.
- 854 Izawa, J., and Shadmehr, R. (2011). Learning from Sensory and Reward Prediction Errors  
855 during Motor Adaptation. *PLoS Computational Biology* 7, e1002012.
- 856 Jordan, K., Heinze, H.-J., Lutz, K., Kanowski, M., and Jäncke, L. (2001). Cortical  
857 Activations during the Mental Rotation of Different Visual Objects. *NeuroImage* 13, 143–  
858 152.
- 859 Keisler, A., and Shadmehr, R. (2010). A Shared Resource between Declarative Memory and  
860 Motor Memory. *Journal of Neuroscience* 30, 14817–14823.
- 861 van der Kooij, K., and Overvliet, K.E. (2016). Rewarding imperfect motor performance  
862 reduces adaptive changes. *Experimental Brain Research* 234, 1441–1450.
- 863 Leow, L.-A., de Rugy, A., Marinovic, W., Riek, S., and Carroll, T.J. (2016). Savings for

864 visuomotor adaptation require prior history of error, not prior repetition of successful actions.  
865 *Journal of Neurophysiology* 116, 1603–1614.

866 Loonis, R.F., Brincat, S.L., Antzoulatos, E.G., and Miller, E.K. (2017). A Meta-Analysis  
867 Suggests Different Neural Correlates for Implicit and Explicit Learning. *Neuron* 96, 521-  
868 534.e7.

869 Manley, H., Dayan, P., and Diedrichsen, J. (2014). When Money Is Not Enough: Awareness,  
870 Success, and Variability in Motor Learning. *PLoS ONE* 9, e86580.

871 Maxwell, J.P., Masters, R.S.W., Kerr, E., and Weedon, E. (2001). The implicit benefit of  
872 learning without errors. *The Quarterly Journal of Experimental Psychology A* 54, 1049–1068.

873 McDougle, S.D., and Taylor, J.A. (2019). Dissociable cognitive strategies for sensorimotor  
874 learning. *Nature Communications* 10.

875 McNab, F., and Klingberg, T. (2008). Prefrontal cortex and basal ganglia control access to  
876 working memory. *Nature Neuroscience* 11, 103–107.

877 Morehead, J.R., Qasim, S.E., Crossley, M.J., and Ivry, R. (2015). Savings upon Re-Aiming in  
878 Visuomotor Adaptation. *Journal of Neuroscience* 35, 14386–14396.

879 Morehead, J.R., Taylor, J.A., Parvin, D., and Ivry, R.B. (2017). Characteristics of Implicit  
880 Sensorimotor Adaptation Revealed by Task-irrelevant Clamped Feedback. *Journal of*  
881 *Cognitive Neuroscience* 1–14.

882 Nakahara, H., and Hikosaka, O. (2012). Learning to represent reward structure: A key to  
883 adapting to complex environments. *Neuroscience Research* 74, 177–183.

884 Pearson-Fuhrhop, K.M., Minton, B., Acevedo, D., Shahbaba, B., and Cramer, S.C. (2013).  
885 Genetic Variation in the Human Brain Dopamine System Influences Motor Learning and Its  
886 Modulation by L-Dopa. *PLoS ONE* 8, e61197.

- 887 Pekny, S.E., Izawa, J., and Shadmehr, R. (2015). Reward-Dependent Modulation of  
888 Movement Variability. *Journal of Neuroscience* 35, 4015–4024.
- 889 Peters, M., and Battista, C. (2008). Applications of mental rotation figures of the Shepard and  
890 Metzler type and description of a mental rotation stimulus library. *Brain and Cognition* 66,  
891 260–264.
- 892 Quattrocchi, G., Monaco, J., Ho, A., Irmen, F., Strube, W., Ruge, D., Bestmann, S., and  
893 Galea, J.M. (2018). Pharmacological Dopamine Manipulation Does Not Alter Reward-Based  
894 Improvements in Memory Retention during a Visuomotor Adaptation Task. *Eneuro* 5,  
895 ENEURO.0453-17.2018.
- 896 Shepard, R., N., and Metzler, J. (1971). Mental Rotation of Three-Dimensional Objects.  
897 *Science* 171, 701–703.
- 898 Shmuelof, L., Huang, V.S., Haith, A.M., Delnicki, R.J., Mazzoni, P., and Krakauer, J.W.  
899 (2012). Overcoming Motor “Forgetting” Through Reinforcement Of Learned Actions.  
900 *Journal of Neuroscience* 32, 14617–14621a.
- 901 Sidarta, A., van Vugt, F., and Ostry, D.J. (2018). Somatosensory Working Memory in Human  
902 Reinforcement-Based Motor Learning. *Journal of Neurophysiology* 41.
- 903 Sobel, M.E. (1986). Some New Results on Indirect Effects and Their Standard Errors in  
904 Covariance Structure Models. *Sociological Methodology* 16, 159.
- 905 Suchan, B., Botko, R., Gizewski, E., Forsting, M., and Daum, I. (2006). Neural substrates of  
906 manipulation in visuospatial working memory. *Neuroscience* 139, 351–357.
- 907 Sutton, R.S., and Barto, A. (1998). *Reinforcement Learning: An Introduction* (Cambridge,  
908 Mass: A Bradford Book).
- 909 Taylor, J.A., and Ivry, R.B. (2011). *Flexible Cognitive Strategies during Motor Learning*.



910 PLoS Computational Biology 7, e1001096.

911 Taylor, J.A., and Ivry, R.B. (2014). Cerebellar and Prefrontal Cortex Contributions to  
912 Adaptation, Strategies, and Reinforcement Learning. In Progress in Brain Research,  
913 (Elsevier), pp. 217–253.

914 The 1000 Genomes Project Consortium, Gibbs, R.A., Boerwinkle, E., Doddapaneni, H., Han,  
915 Y., Korchina, V., Kovar, C., Lee, S., Muzny, D., Reid, J.G., et al. (2015). A global reference  
916 for human genetic variation. *Nature* 526, 68–74.

917 Therrien, A.S., Wolpert, D.M., and Bastian, A.J. (2016). Effective reinforcement learning  
918 following cerebellar damage requires a balance between exploration and motor noise. *Brain*  
919 139, 101–114.

920 Therrien, A.S., Wolpert, D.M., and Bastian, A.J. (2018). Increasing Motor Noise Impairs  
921 Reinforcement Learning in Healthy Individuals. *Eneuro* 5, ENEURO.0050-18.2018.

922 Tseng, Y. -w., Diedrichsen, J., Krakauer, J.W., Shadmehr, R., and Bastian, A.J. (2007).  
923 Sensory Prediction Errors Drive Cerebellum-Dependent Adaptation of Reaching. *Journal of*  
924 *Neurophysiology* 98, 54–62.

925 Wong, A.L., Marvel, C.L., Taylor, J.A., and Krakauer, J.W. (2019). Can patients with  
926 cerebellar disease switch learning mechanisms to reduce their adaptation deficits? *Brain* 142,  
927 662–673.

928

929

930

931

932

933

934

935

936

937

938

939

940

941

942

943

944

945

946

947

948

949

950

951

952

| SNP       | location | Allele code -1 | Allele code 0 | Allele code 1 |
|-----------|----------|----------------|---------------|---------------|
| rs4680    | COMT     | G:G (val:val)  | A:G (met:val) | A:A (met:met) |
|           |          | 31, 33         | 68, 61        | 17, 21        |
| rs1800497 | DRD2     | T:T (lys:lys)  | T:C (lys:glu) | C:C (glu:glu) |
|           |          | 8, 7           | 48, 51        | 64, 62        |
| rs907094  | DARPP32  | C:C            | C:T           | T:T           |
|           |          | 10, 21         | 54, 38        | 56, 62        |

953

954 **Table 1: Coding for SNPs.** The name of the SNP is provided along with the code assigned to each allele. The numbers represent the counts for  
955 the specific allele in the two tasks (Preserve, Acquire).

956

957

958

959

960

961



| Population | Outcome  | Predictor      | Beta ± SE      | p                       | Model                                     | In-sample MAE                  | Out-of-sample MAE |
|------------|----------|----------------|----------------|-------------------------|-------------------------------------------|--------------------------------|-------------------|
| All        | SR       | SWM            | 0.416 ± 0.085  | 2.954x10 <sup>-6</sup>  | F(113,2)=12.280, p=1.493x10 <sup>-5</sup> | 0.712 ± 3.627x10 <sup>-4</sup> | 0.734 ± 0.007     |
|            |          | COMT           | 0.087 ± 0.084  | 0.303                   |                                           |                                |                   |
|            | Explicit | RWM            | 0.373 ± 0.095  | 1.784x10 <sup>-4</sup>  | F(85,2)=15.370, p=1.78x10 <sup>-4</sup>   | 0.789 ± 6.553x10 <sup>-4</sup> | 0.810 ± 0.012     |
|            | MAD(ΔP)  | RWM            | -0.236 ± 0.091 | 0.011                   | F(116,2)=6.767, p=0.011                   | 0.713 ± 3.202x10 <sup>-4</sup> |                   |
|            |          | ΔR             | SWM            | -0.251 ± 0.090          | 0.006                                     | F(116,2)=4.420, p=0.014        |                   |
| MAD(ΔR)    | SWM      | -0.283 ± 0.090 | 0.002          | F(116,2)=5.292, p=0.006 | 0.749 ± 2.986x10 <sup>-4</sup>            | 0.763 ± 0.006                  |                   |
| Caucasian  | SR       | SWM            | 0.283 ± 0.101  | 0.006                   | F(80,2)=7.882, p=0.006                    | 0.761 ± 5.629x10 <sup>-4</sup> | 0.782 ± 0.008     |
|            | Explicit | RWM            | 0.300 ± 0.105  | 0.006                   | F(53,2)=8.207, p=0.006                    | 0.741 ± 9.733x10 <sup>-4</sup> |                   |
|            | MAD(ΔP)  | RWM            | -0.237 ± 0.109 | 0.033                   | F(78,2)=4.730, p = 0.033                  | 0.759 ± 4.767x10 <sup>-4</sup> | 0.779 ± 0.009     |
|            |          | ΔR             | SWM            | -0.207 ± 0.101          | 0.044                                     | F(78,2)=4.188, p = 0.044       |                   |
|            | MAD(ΔR)  | SWM            | -0.215 ± 0.105 | 0.044                   | F(78,2)=4.176, p = 0.044                  | 0.757 ± 4.098x10 <sup>-4</sup> | 0.777 ± 0.009     |

963

964 **Table 2: Regressions with significant models for the Acquire task. The predictors selected by the stepwise regression procedure to have**  
965 **a model significantly better than the intercept only model are reported. For each model the selected predictors are reported alongside**  
966 **the coefficient and standard error and associated p value for that predictor, as well as the significance of the model overall. The results**  
967 **of the 10-fold cross-validation analysis are reported in terms of the mean ± SD of the absolute error (MAE) of the model prediction for**

968 **the 1000 repetitions. Results are reported when including all participants (N=121) or the Caucasian only subset (N=82), demonstrating**  
 969 **that the reported results are consistent in both.**

970

971

972

973

| Population | Outcome   | Predictor | Beta ± SE      | p              | Model                    | In-sample MAE                  | Out-of-sample MAE |
|------------|-----------|-----------|----------------|----------------|--------------------------|--------------------------------|-------------------|
| All        | early SR  | RWM       | 0.255 ± 0.089  | 0.005          | F(2,118)=8.207, p=0.005  | 0.814 ± 3.416x10 <sup>-4</sup> | 0.830 ± 0.005     |
|            |           | RWM       | 0.287 ± 0.088  | 0.002          | F(2,118)=10.583, p=0.002 | 0.800 ± 3.984x10 <sup>-4</sup> |                   |
|            | Retention | Ethnicity | -0.528 ± 0.248 | 0.037          | F(2,68)=4.525, p = 0.037 | 0.715 ± 7.025x10 <sup>-4</sup> | 0.741 ± 0.022     |
|            |           | ΔR        | SWM            | -0.194 ± 0.091 | 0.036                    | F(2,118)=4.502, p=0.036        |                   |
| Caucasian  | late SR   | RWM       | 0.232 ± 0.106  | 0.031          | F(2,83)=6.766, p= 0.011  | 0.804 ± 3.884x10 <sup>-4</sup> | 0.827 ± 0.008     |
|            | Retention | DARPP32   | -0.214 ± 0.101 | 0.040          | F(2,45)=4.451, p = 0.040 | 0.529 ± 6.248x10 <sup>-4</sup> |                   |
| SR>40%     | late SR   | SWM       | 0.156 ± 0.069  | 0.026          | F(2,68)=5.173, p = 0.026 | 0.434 ± 4.720x10 <sup>-4</sup> | 0.449 ± 0.005     |

974

975 **Table 3. Regression with significant models for Preserve task. The predictors selected by the stepwise regression procedure to have a**  
 976 **model significantly better than the intercept only model are reported. For each model the selected predictors are reported alongside the**  
 977 **coefficient and standard error and associated p value for that predictor, as well as the significance of the model overall. The results of**  
 978 **the 10-fold cross-validation analysis are reported in terms of the mean  $\pm$  SD of the absolute error (MAE) of the model prediction for the**  
 979 **1000 repetitions. Results are reported when including all participants (N=120) or the Caucasian only subset (N=85), demonstrating that**  
 980 **the relationship between RWM and late success rate are consistent in both and revealing a genetic predictor of retention.**

|          |         | $\Delta R$                      | $\Delta P$                     | Model                                              |
|----------|---------|---------------------------------|--------------------------------|----------------------------------------------------|
| Acquire  | $\beta$ | -0.274                          | 0.581                          | F(115,2)=11.9<br>p=2.09 $\times$ 10 <sup>-5</sup>  |
|          | SE      | 0.111                           | 0.120                          |                                                    |
|          | p       | 0.015                           | 3.89 $\times$ 10 <sup>-6</sup> |                                                    |
| Preserve | $\beta$ | -0.750                          | 0.229                          | F(112,2)=35.3<br>p=1.28 $\times$ 10 <sup>-12</sup> |
|          | SE      | 0.093                           | 0.084                          |                                                    |
|          | p       | 1.07 $\times$ 10 <sup>-12</sup> | 0.007                          |                                                    |

983

984           **Table 4: Regression results for split data for both the Acquire and Preserve tasks. Ordinary least squares linear regressions were**  
985 **performed with both  $\Delta R$  and  $\Delta P$  included as predictors. The regression coefficient, standard error and p value for each predictor are**  
986 **reported along with the significance of the comparison between the model and an intercept only model. In both tasks there is an**  
987 **opposing relationship between  $\Delta R$  and  $\Delta P$  and success rate, with smaller changes after rewarded trials and larger changes after**  
988 **unrewarded trials predictive of success.**

989

990

991
